# Supplementary material for: Genome-Wide Analysis of Glycerol-3-Phosphate Acyltransferase (GPAT) Family in Perilla frutescens and Functional Characterization of PfGPAT9 Crucial for Biosynthesis of Storage Oils Rich in High-Value Lipids
Source: MDPI journal article supplement (doi:10.3390/ijms242015106), 2023-10-12
Supplement: s1 [file s1]

**Table S1.** GPAT protein IDs of *P. frutescens* and *Arabidopsis*.

| Protein   | Protein ID   | Protein | Protein ID  |
|-----------|--------------|---------|-------------|
| PfATS1-1  | KAH6788306.1 | AtGPAT1 | NP_563768.1 |
| PfATS1-2  | KAH6771592.1 | AtGPAT2 | NP_563651.1 |
| PfGPAT9   | KAH6811989.1 | AtGPAT3 | NP_192104.1 |
| PfGPAT1   | KAH6785423.1 | AtGPAT4 | NP_171667.1 |
| PfGPAT5-1 | KAH6777675.1 | AtGPAT5 | NP_187750.1 |
| PfGPAT5-2 | KAH6769216.1 | AtGPAT6 | NP_181346.1 |
| PfGPAT7-1 | KAH6805671.1 | AtGPAT7 | NP_196227.1 |
| PfGPAT7-2 | KAH6802360.1 | AtGPAT8 | NP_191950.2 |
| PfGPAT4   | KAH6813183.1 | AtGPAT9 | NP_568925.1 |
| PfGPAT6-1 | KAH6777730.1 | AtATS1  | NP_174499.1 |
| PfGPAT6-2 | KAH6769243.1 |         |             |
| PfGPAT6-3 | KAH6806876.1 |         |             |
| PfGPAT6-4 | KAH6798376.1 |         |             |
| PfGPAT8   | KAH6812091.1 |         |             |

**Table S2.** Basic physicochemical properties of PfGPAT proteins.

| Group | Gene      | Gene ID      | Chr | CDS (bp) | Protein (aa) | MW (kDa) | pI   | GRAVY  | Instability index | Predicted subcellular localization | Predicted transmembrane domains |
|-------|-----------|--------------|-----|----------|--------------|----------|------|--------|-------------------|------------------------------------|---------------------------------|
| I     | PfATS1-1  | C2S51_000050 | 02  | 1365     | 454          | 50.36    | 6.14 | −0.209 | 49.79             | cp                                 | 0                               |
| I     | PfATS1-2  | C2S51_000133 | 05  | 1377     | 458          | 50.76    | 5.81 | −0.217 | 50.23             | cp                                 | 0                               |
| II    | PfGPAT9   | C2S51_025751 | 12  | 1116     | 371          | 42.89    | 8.96 | −0.102 | 47.51             | ER                                 | 3                               |
| III-a | PfGPAT1   | C2S51_037878 | 20  | 1248     | 415          | 46.11    | 8.94 | 0.13   | 35.07             | mt                                 | 2                               |
| III-b | PfGPAT5-1 | C2S51_008987 | 04  | 1491     | 496          | 54.72    | 9.07 | 0.247  | 36.25             | ER                                 | 2                               |
| III-b | PfGPAT5-2 | C2S51_014552 | 06  | 1491     | 496          | 54.59    | 8.99 | 0.245  | 35.21             | ER                                 | 2                               |
| III-b | PfGPAT7-1 | C2S51_030502 | 15  | 1422     | 473          | 52.68    | 9.57 | 0.224  | 39.49             | ER                                 | 2                               |
| III-b | PfGPAT7-2 | C2S51_033806 | 17  | 1482     | 493          | 55.03    | 9.44 | 0.206  | 37.24             | ER                                 | 2                               |
| III-c | PfGPAT4   | C2S51_022201 | 11  | 1506     | 501          | 55.53    | 9.2  | 0.155  | 36.44             | mt                                 | 3                               |
| III-c | PfGPAT6-1 | C2S51_009042 | 04  | 1506     | 501          | 56.11    | 9.22 | 0.06   | 37.21             | ER                                 | 2                               |
| III-c | PfGPAT6-2 | C2S51_014579 | 06  | 1506     | 501          | 56.10    | 9.32 | 0.062  | 37.02             | ER                                 | 2                               |
| III-c | PfGPAT6-3 | C2S51_027984 | 14  | 1509     | 502          | 56.75    | 9.39 | −0.007 | 40.78             | ER                                 | 2                               |
| III-c | PfGPAT6-4 | C2S51_034860 | 18  | 1509     | 502          | 56.75    | 9.49 | 0.009  | 40.6              | ER                                 | 2                               |
| III-c | PfGPAT8   | C2S51_025853 | 12  | 1506     | 501          | 55.57    | 9.25 | 0.144  | 36.3              | mt                                 | 3                               |

ER, endoplasmic reticulum; cp, chloroplast; mt, mitochondrion.

**Table S3.** The primers used in this study.

| Primer names            | Forward primer (5'→3')                              | Reverse primer (5'→3')                            |
|-------------------------|-----------------------------------------------------|---------------------------------------------------|
| PfGPAT9-q               | TTCGCCAACTCTGACTGA                                  | CAACTCCACAAGACCTCTC                               |
| PfGPAT9-<br>pCAMBIA1300 | ATACACCAAATCGACTCTAGAATGAGT<br>AAGCTCAACACATCGAGC   | GTCGACCCCGGGCCCCTGCAGTTTCTCT<br>TCCAGGCGACGG      |
| 35S-GFP                 | GCCTTGCTTCCTATTATATCTTCCCAAAT<br>TACC               | GAACTTGTGGCCGTTTACGTCGC                           |
| PfGPAT9-<br>pYES2.0     | ATTAAGCTTGGTACCGAGCTCATGAGTA<br>AGCTCAACACATCGAGC   | TACATGATGCGGCCCTCTAGACTATTTT<br>TCTTCCAGGCGACGG   |
| T7/CYC1                 | TAATACGACTCACTATAGGG                                | GTGACATAACTAATTACATGATG                           |
| PfGPAT9-<br>pCAMBIA1303 | TCGGCATGCAGCGCTGGGCCCATGAGT<br>AAGCTCAACACATCGAGC   | TCCTCTAGAGTCGACCTGCAGCTATTTT<br>TCTTCCAGGCGACGG   |
| M13                     | GTAAACGACGGCCAGT                                    | CAGGAAACAGCTATGAC                                 |
| PfGPAT9-DSRB            | CACCATGTTGGGCCCCGGCGGCCATGA<br>GTAAGCTCAACACATCGAGC | GTTGTCACATACATCGGCGCGCCCTATT<br>TCTCTTCCAGGCGACGG |

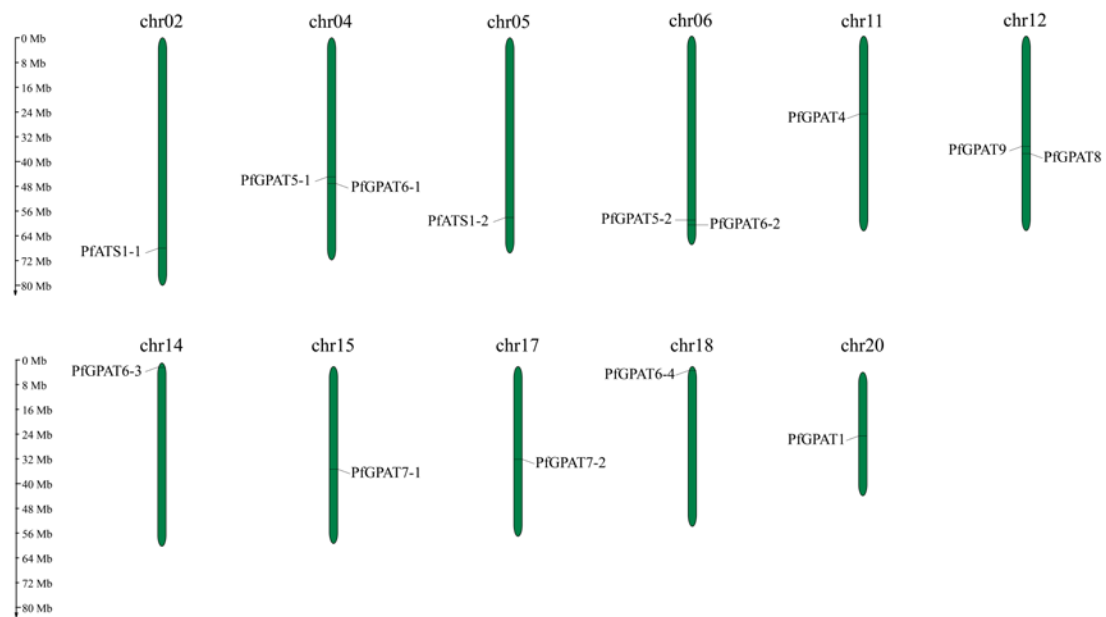

**Figure S1.** Chromosomal locations of PfGPAT genes. The relative length of the chromosomes is millions of base pairs (Mb).

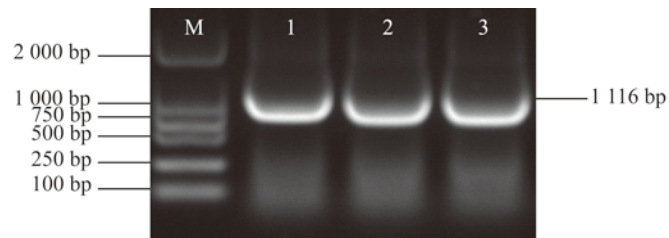

**Figure S2.** PCR cloning of *PfGPAT9* gene ORF. M, DNA Marker DL 2000; 1-3, The PCR product of full-length ORF of *PfGPAT9* gene.

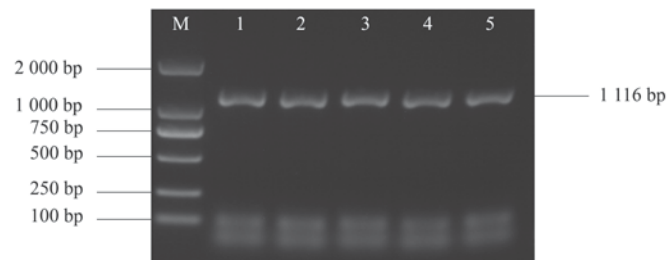

**Figure S3.** PCR detection of *PfGPAT9*- transgenic yeast. M, DNA Marker DL 2000; 1-5, INVSc1 transformed with pYES2.0+*PfGPAT9*.

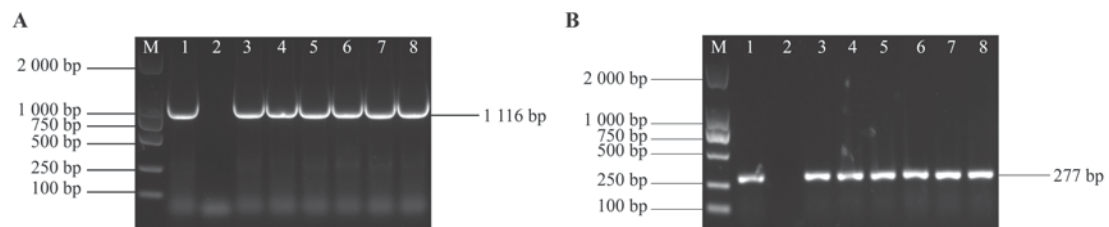

**Figure S4.** PCR detection of *PfGPAT9*- transgenic tobacco. PCR detection of genomic level **(A)** and transcription level **(B)** of *PfGPAT9*- transgenic tobacco lines. M, DNA Marker DL 2000; 1, pCAMBIA1303+*PfGPAT9* recombinant plasmid; 2, untransformed (WT) tobacco line; 3-8, *PfGPAT9*-transgenic tobacco lines.

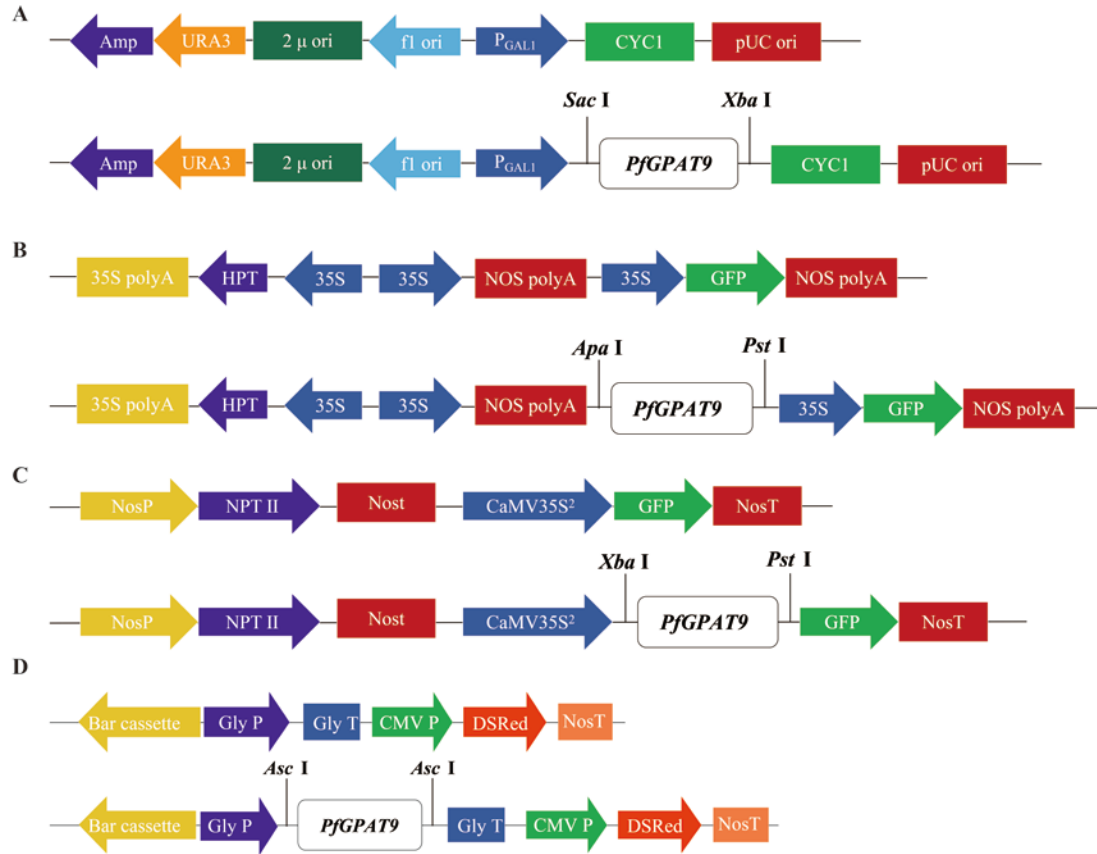

**Figure S5.** Diagrams showing different expression vectors carrying with the *PfGPAT9* gene. **(A)** Diagram showing pYES2.0+*PfGPAT9* yeast expression vector. **(B)** Diagram showing pCambia1303+*PfGPAT9* plant expression vector. **(C)** Diagram showing pCambia1300+*PfGPAT9*/GFP expression vector. **(D)** Diagram showing pJC-Gly-DSRB+*PfGPAT9* seed-specific expression vector.
